# Supplementary material
Source: Frontiers journal article supplement (https://www.frontiersin.org/articles/427987)
Supplement: Table_2.xlsx [file Table_2.xlsx]

## Sheet: Sheet1
Supplementary Table 2: Antibiotic usage information of 26 infants.
Numbering	Indication	Antibiotics Type	Routs	Dosage(g)/day	Duration(day)	Cumulative dose(g)	Interval Time(day)
B4	neonatal infection	cefaclor	oral	0.12	4	0.48	38
B5	neonatal infection	cefaclor	oral	0.12	2	0.24	41
B13	neonatal infection	cefaclor	oral	0.12	2	0.24	43
B20	neonatal pneumonia	ceftazidime	injection	0.17	6	1.02	44
B28	neonatal infection	cefaclor	oral	0.12	2	0.24	39
B32	neonatal infection	cefaclor	oral	0.12	2	0.24	42
B33	neonatal infection	cefaclor	oral	0.12	4	0.48	54
B44	neonatal infection	cefaclor	oral	0.12	4	0.48	50
B47	neonatal infection	cefaclor	oral	0.12	4	0.48	54
B53	neonatal infection	cefaclor	oral	0.12	3	0.36	63
B54	neonatal infection	cefaclor	oral	0.12	3	0.36	40
B61	neonatal infection	cefaclor	oral	0.04	1	0.04	51
B68	neonatal infection	cefaclor	oral	0.08	3	0.24	39
B70	neonatal infection	cefaclor	oral	0.12	4	0.48	45
B80	neonatal infection	cefaclor	oral	0.12	3	0.36	66
B91	neonatal infection	cefaclor	oral	0.12	4	0.48	57
B94	neonatal infection	cefaclor	oral	0.12	4	0.48	42
B103	neonatal infection	cefaclor	oral	0.12	2	0.24	44
B107	neonatal infection	cefaclor	oral	0.12	4	0.48	48
B108	neonatal infection	cefaclor	oral	0.12	2	0.24	43
B112	neonatal pneumonia	cefoperazone+ceftazidime	injection	0.15	11	1.65	32
B125	neonatal infection	cefaclor	oral	0.12	1	0.12	45
B127	neonatal infection	ceftazidime	injection	0.15	6	0.9	46
B128	neonatal pneumonia	cefuroxime	injection	0.2	6	1.2	46
B129	neonatal infection	cefaclor	oral	0.12	4	0.48	47
B139	neonatal infection	cefaclor	oral	0.12	2	0.24	50
